# Supplementary material for: The short Thai version of functional outcomes of sleep questionnaire (FOSQ-10T): reliability and validity in patients with sleep-disordered breathing
Source: Springer Nature journal article supplement (doi:10.1007/s11325-024-03024-1), 2024-05-15
Supplement: MOESM1 [file 27095004]

**แบบสอบถามผลลัพธ์การทำหน้าที่ของการนอนหลับ-ฉบับย่อ (Thai version)**

**(The Functional Outcome of Sleep Questionnaire- short version)**

บางคนมีความยากลำบากในการทำกิจกรรมประจำวันเมื่อมีรู้สึกอ่อนล้าหรือง่วงนอน แบบสอบถามฉบับนี้มีวัตถุประสงค์เพื่อประเมินว่าโดยทั่วไปแล้วท่านมีความยากลำบากในการทำกิจกรรมต่างๆ เมื่อมีอาการอ่อนล้าหรือง่วงนอนมาก โดยความง่วงนอนหรืออ่อนล้า ในที่นี้หมายถึง ความรู้สึกที่ท่านไม่สามารถจะทำให้ตาสว่าง หรือมีอาการสัปหงก รู้สึกเหมือนจะเพลอหลับ โดยที่ไม่ใช่เป็นความรู้สึกเหนื่อยหรืออ่อนล้าจากภายหลังการออกกำลังกาย

คำชี้แจง :

กรุณาเลือกคำตอบในช่องว่างเพียงคำตอบเดียวที่เป็นจริงสำหรับตัวท่าน

| กิจกรรม                                                                              | ไม่ได้มีกิจกรรมนี้<br>(0) | ระดับความยากลำบาก        |                 |                |            |
|--------------------------------------------------------------------------------------|---------------------------|--------------------------|-----------------|----------------|------------|
|                                                                                      |                           | ไม่มีความยากลำบาก<br>(4) | เล็กน้อย<br>(3) | ปานกลาง<br>(2) | มาก<br>(1) |
| 1. ท่านมีความยากลำบากในการมีสมาธิกับสิ่งที่ทำเนื่องมาจากท่านรู้สึกง่วงนอนหรืออ่อนล้า |                           |                          |                 |                |            |
| 2. ท่านมีความยากลำบากในการจดจำสิ่งต่างๆเนื่องมาจาก                                   |                           |                          |                 |                |            |

|                                                                                                                  |                               |                                   |                          |                         |                     |
|------------------------------------------------------------------------------------------------------------------|-------------------------------|-----------------------------------|--------------------------|-------------------------|---------------------|
| ท่านรู้สึกง่วงนอนหรืออ่อนล้า                                                                                     |                               |                                   |                          |                         |                     |
| 3. ท่านมีความยากลำบากในการขับเคลื่อนยนต์เป็นระยะทางไกลๆ<br>เนื่องจากท่านรู้สึกง่วงนอนหรืออ่อนล้า                 |                               |                                   |                          |                         |                     |
| 4. ท่านมีความยากลำบากในการขับเคลื่อนยนต์เป็นระยะทางไกลๆ<br>เนื่องจากท่านรู้สึกง่วงนอนหรืออ่อนล้า                 |                               |                                   |                          |                         |                     |
| 5. ท่านมีความยากลำบากในการไปเยี่ยมเยียนครอบครัวหรือเพื่อนๆ ของท่าน<br>เนื่องจากท่านรู้สึกง่วงนอนหรืออ่อนล้า      |                               |                                   |                          |                         |                     |
| กิจกรรม                                                                                                          | ไม่ได้มีกิจกรรมนี้<br><br>(0) | ระดับความยากลำบาก                 |                          |                         |                     |
|                                                                                                                  |                               | ไม่มีความยากลำบาก<br><br>ก<br>(4) | เล็กน้อย<br><br>ย<br>(3) | ปานกลาง<br><br>ล<br>(2) | มาก<br><br>ม<br>(1) |
| 6. ความสัมพันธ์ระหว่างครอบครัว เพื่อน หรือเพื่อนร่วมงานของท่านเปลี่ยนแปลงไปเนื่องจากท่านรู้สึกง่วงนอนหรืออ่อนล้า |                               |                                   |                          |                         |                     |

|                                                                                                            |                                              |                                         |                                              |                                             |                                         |
|------------------------------------------------------------------------------------------------------------|----------------------------------------------|-----------------------------------------|----------------------------------------------|---------------------------------------------|-----------------------------------------|
| 7. ท่านมีความยากลำบากในการที่จะดูโทรทัศน์หรือชมภาพยนตร์เนื่องจากท่านรู้สึกง่วงนอนหรืออ่อนล้า               |                                              |                                         |                                              |                                             |                                         |
| 8. ท่านมีความยากลำบากในการที่จะทำให้ตัวเองรู้สึกกระฉับกระเฉงในตอนเย็นเนื่องจากท่านรู้สึกง่วงนอนหรืออ่อนล้า |                                              |                                         |                                              |                                             |                                         |
| 9. ท่านมีความยากลำบากในการที่จะทำให้ตัวเองรู้สึกกระฉับกระเฉงในตอนเช้าเนื่องจากท่านรู้สึกง่วงนอนหรืออ่อนล้า |                                              |                                         |                                              |                                             |                                         |
| <b>กิจกรรม</b>                                                                                             | <b>ไม่ได้มีเพศสัมพันธ์</b><br><br><b>(0)</b> | <b>ไม่เปลี่ยนแปลง</b><br><br><b>(4)</b> | <b>เปลี่ยนแปลงเล็กน้อย</b><br><br><b>(3)</b> | <b>เปลี่ยนแปลงปานกลาง</b><br><br><b>(2)</b> | <b>เปลี่ยนแปลงมาก</b><br><br><b>(1)</b> |
| 10. ความต้องการการใกล้ชิดหรือการมีเพศสัมพันธ์ของท่านเปลี่ยนแปลงไปเนื่องจากท่านรู้สึกง่วงนอนหรืออ่อนล้า     |                                              |                                         |                                              |                                             |                                         |
